# Supplementary material for: Identification and Characterization of Escherichia coli, Salmonella Spp., Clostridium perfringens, and C. difficile Isolates from Reptiles in Brazil
Source: Biomed Res Int. 2019 May 27;2019:9530732. doi: 10.1155/2019/9530732 (PMC6556801; doi:10.1155/2019/9530732)
Supplement: Supplementary Materials — The primers used to detect genes encoding virulence factors associated with diarrheagenic E. coli in humans and animals and their references are described in Table S1 in the Supplementary Material. [file 9530732.f1.xlsx]

## Sheet: Planilha1
Table S1. PCR primers used for the detection of virulence genes of diarrheagenic E. coli
Virulence factor	Primers sequence (5’-3’)		Size of product (bp)	Reference
	Forward	Reverse
K99	TATTATCTTAGGTGGTATGG	GGTATCCTTTAGCAGCAGTATTTC	314	FRANCK, BOSWORTH, MOON, 1998. PMCID: PMC104926
F41	GCATCAGCGGCAGTATCT	GTCCCTAGCTCAGTATTATCACCT	380
Intimin	ATATCCGTTTTAATGGCTATCT	AATCTTCTGCGTACTGTGTTCA	425
Stx1	TTCGCTCTGCAATAGGTA	TTCCCCAGTTCAATGTAAGAT	555
Stx2	GTGCCTGTTACTGGGTTTTTCTTC	AGGGGTCGATATCTCTGTCC	118
STa	GCTAATGTTGGCAATTTTTATTTCTGTA	AGGATTACAACAAAGTTCACAGCAGTAA	190
Stx2e	AATAGTATACGGACAGCGAT	TCTGACATTCTGGTTGACTC	733	MACEDO et al., 2007. DOI: 10.1590/S0102-09352007000500005.
STb	TGCCTATGCATCTACACAAT	CTCCAGCAGTACCATCTCTA	113
LT	GGCGTTACTATCCTCTCTAT	TGGTCTCGGTCAGATATGT	272
987P	GTAACTCCACCGTTTGTATC	AAGTTACTGCCAGTCTATGC	409
F18	TGGTAACGTATCAGCAACTA	ACTTACAGTGCTATTCGACG	313
K88	GTATCTGTCCGAGAATATCA	GTTGGTACAGGTCTTAATGG	499
Sth	TTCACCTTTCCCTCAGGATG	CTATTCATGCTTTCAGGACCA	120	RODAS et al., 2009. PMCID: PMC2668350
CFA-I	GCTTATTCTCCCGCATCAAA	ACTTGTCCTCCCCATGACAC	170
CS1	TCCGTTCGGCTAAGTCAGTT	CCGCACATTTCCTGTGTTCT	243
CS4	ACCTGCGGCAAGTCGTTT	TCTGCAGGTTCAAAAGTCACA	198
CS7	CGCCGGTTACACGTAGTGAT	CCATTTAAAGTGATTGCGACTT	154
CS12	CCAGTCTATGCCAGGTTGCT	TGTGGGGTCACAGTTTACCA	137
CS3	CTAGCTTTGCCACCACCATT	GGCAACTGACTCCCATTTGT	100
CS21	TCATGAGCCTGCTGGAAGTTATCA	TCCGGCTACCTAAAGTAATTGAGT	617
CS2	AGTGGTGGCAGCGAAACTAT	TTCCTCTGTGGGTTCTCAGG	368
CS5	TCCGCTCCCGTTACTCAG	GAAAAGCGTTCACACTGTTTATATT	226
CS17	GGAGACGCTGAATACAACTGA	CTCAGGCGCAGTTCCTTGT	130
CS17/19	CGGTGCGTTTAACACAGCTA	TCGATACACTCGCATTCGTT	195
CS8	ATCCGGATTATCAAGCTCCA	GAAGATGTTATTGCACCACCAA	166
CS6	CTGTGAATCCAGTTTCGGGT	CAGGAACTTCCGGAGTGGTA	152
CS15	CGAAATTGGACAAGCGATG	TCCAGCAGGGATATTATTCG	130
CS20	AGGTATCCAAATCCGCACTG	CATCAGCCAGCACATAGGAA	114
CS18	ATCCGTCAGGTGTTTGTGGT	CACCTGAATTCCTCGACAGG	362
CS13	GGGACTGCCACAATGAATTT	CAGCACCACCTGCTGATTTA	178
CS14	TTTGCAACCGACATCTACCA	CCGGATGTAGTTGCTCCAAT	162
CS22	ATTGGACAAGCGTCCAACAC	TTCCAGCAGGGATATTATCATTTT	127
Iha	CAGTTCAGTTTCGCATTCACC	GTATGGCTCTGATGCGATG	1305	TATARCZAK et al., 2005. DOI: 10.1016/j.vetmic.2005.07.004
Toxb	ATACCTACCTGCTCTGGATTGA	TTCTTACCTGATCTGATGCAGC	602
Efa1	GAGACTGCCAGAGAAAG	GGTATTGTTGCATGTTCAG	479
HlyA	GGTGCAGCAGAAAAAGTTGTAG	TCTCGCCTGATAGTGTTTGGTA	1551	SCHMIDT et al., 1995. PMCID: PMC173109
Saa	CGTGATGAACAGGCTATTGC	ATGGACATGCCTGTGGCAAC	119	JENKINS et al., 2003. PMCID: PMC153935
Bfp	AATGGTGCTTGCGCTTGCTGC	GCCGCTTTATCCAACCTGGTA	326	GUNZBURG et al., 1995. PMCID: PMC228170
CNF-2	AATCTAATTAAAGAGAAC	CATGCTTTGTATATCTA	543	BLANCO et al., 1996. DOI: 10.1016/0167-7012(96)00900-1
CNF-1	GAACTTATTAAGGATAGT	CATTATTTATAACGCTG	543
F17	GCAGAAAATTCAATTTATCCTTGG	CTGATAAGCGATGGTGTAATTAAC	537	BERTIN et al., 1996. PMCID: PMC229434
Aggr	CAGAATACATCAGTACACTG	GAAGCTTACAGCCGATATAT	433	TOKUDA et al., 2010. DOI: 10.1111/j.1348-0421.2010.00210.x
Aaf	TGCGATTGCTACTTTATTAT	ATTGACCGTGATTGGCTTCC	242
Pet	ACTGGCGGACTCATTGCTGT	GCGTTTTTCCGTTCCCTATT	832
IpaH	GTTCCTTGACCGCCTTTCCGATACCGTC	GCCGGTCAGCCACCCTCTGAGAGTAC	600	ARANDA et al., 2007. DOI: 10.1111/j.1574-6968.2006.00580.x
Aida-I	TGCAAACATTAAGGGCTCG	CCGGAAACATTGACCATACC	450	NIEWERTH et al., 2001. PMCID: PMC96024
East-1	CCATCAACACAGTATATCCGA	GGTCGCGAGTGACGGCTTTGT	111	YAMAMOTO, NAKAZAWA, 1997. PMCID: PMC229543
NetB	GCTGGTGCTGGAATAAATGC	TCGCCATTGAGTAGTTTCCC	563	KEYBURN ET AL., 2008. PMCID: PMC2233674
NetE	TAGAAAACGTTCAATTGTATGG	AGAAAGCGCTGATACAGCTAATAAA	601	GOHARI et al., 2015. PMCID: PMC4390311
NetF	AACAATATGTACAGGTATAACT	TTGATAGGTATAATATGGTTCT	862
NetG	TTGTTCAGGATTAGTAGCATTA	CATGAGTTGCATAAGTTGGTGT	860
Cpa	GCTAATGTTACTGCCGTTGA	CCTCTGATACATCGTGTAAG	324	VIEIRA et al., 2008
Cpb	GCGAATATGCTGAATCATCTA	GCAGGAACATTAGTATATCTT	196
Etx	GCGGTGATATCCATCTATTC	CCACTTACTTGTCCTACTAAC	655
Ia	ACTACTCTCAGACAAGACAG	CTTTCCTATTACTATACG	298
Cpb-2	AGATTTTAAATATGATCCTAACC	CAATACCCTTCACCAAATACTC	573
Cpe	GGAGATGGTTGGATATTAGG	GGACCAGCAGTTGTAGATA	233
TcdA	AGATTCCTATATTTACATGACAATAT	GTATCAGGCATAAAGTAATATACTTT	365	SILVA et al., 2011; DOI: http://dx.doi.org/10.1590/S0103-84782011005000100
TcdB	GGAAAAGAGAATGGTTTTATTAA	ATCTTTAGTTATAACTTTGACATCTTT	160
CdtB	TTGACCCAAAGTTGATGTCTGATTG	CGGATCTCTTGCTTCAGTCTTTATAG	262
